# Supplementary material
Source: HighWire-hosted journal article supplement (https://jitc.bmj.com/content/7/1/320)

# Additional File 2

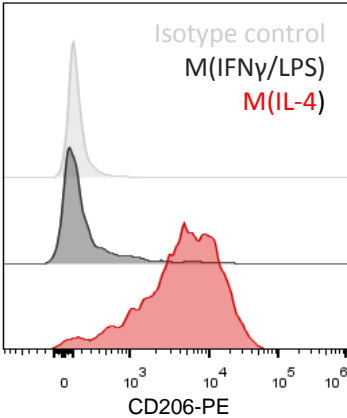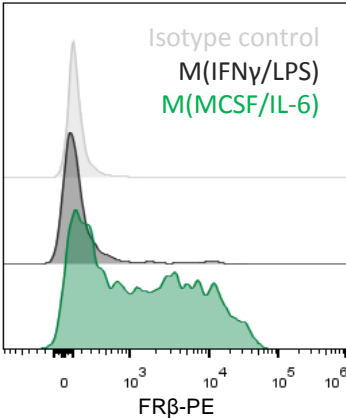

Supplement: media-2 [file media-2.pdf]
